# Supplementary material
Source: Royal Society of Chemistry journal article supplement (doi:10.1039/d6va00098c)
Supplement: d6va00098c7.xlsx [file d6va00098c7.xlsx]

## Sheet: Match Performance
		All signals (nP = 50 ; nN = 67)						S/N > 3 (nP = 50 ; nN = 55)
		Match	P5 » P	FP / %	LR			Match	P5 » P	FP	LR
		1|2|CPE	0.414011	0.000738655	128612			1|2|CPE	0.414011	0.000494471	192125
		1|3|r	0.324036	0.000899451	105620			1|2|r	0.413998	0.000659738	143997
		1|3|CPE	0.32417	0.000911804	104189			1|3|r	0.302085	0.00142122	66844.1
		1|2|r	0.408183	0.00120886	78586.5			1|3|CPE	0.291028	0.00220446	43094.5
		1|2|p	0.289473	1.64063	57.9046			1|2|p	0.321244	0.543425	174.817
		1|3|p	0.203337	8.47588	11.2083			1|3|p	0.204381	5.33056	17.8218
		1|2|pw|1|2	0.984318	16.1983	5.8648			1|3|pw|1|1	1.11087	12.6141	7.53123
		1|3|pw|1|1	1.08673	16.4751	5.76628			1|1|r	0.4064	12.7338	7.46045
		1|1|r	0.323346	16.6422	5.70839			1|2|pw|1|2	0.987483	16.6127	5.71853
		1|3|pw|1|2	1.02756	20.1912	4.70503			1|3|pw|1|2	1.02761	17.4417	5.44672
		2|2|p	-0.00347149	30.1111	3.15499			2|2|CPEw|1|1	-0.907867	40.7821	2.32945
		2|2|CPEw|1|1	-0.942475	43.2658	2.19573			2|3|p	-0.0641753	42.0669	2.25831
		2|3|CPEw|1|1	-0.676226	44.3995	2.13966			2|3|CPEw|1|1	-0.788607	44.0223	2.15799
		2|3|CPEw|1|2	-0.56378	48.1172	1.97434			2|2|p	-0.0579652	45.8529	2.07184
		2|2|pw|1|2	-11.8111	50.3079	1.88837			2|2|pw|1|2	-13.1114	49.8017	1.90756
		1|1|pw|1|1	-0.255589	51.3538	1.84991			2|3|CPEw|1|2	-0.711573	49.8925	1.9041
		1|2|pw|1|1	1.00838	54.7527	1.73508			1|1|pw|1|1	-0.140603	49.9245	1.90287
		3|3|CPEw|1|2	-0.626363	54.7856	1.73403			3|3|CPEw|1|1	-0.792887	55.0214	1.7266
		1|3|CPEw|1|2	-0.675726	54.7903	1.73389			1|3|CPEw|1|1	-0.831567	55.0677	1.72515
		2|3|p	-0.0922828	54.8881	1.7308			3|3|CPEw|1|2	-0.671633	55.3441	1.71653
		3|3|CPEw|1|1	-0.792887	56.9946	1.66682			1|3|CPEw|1|2	-0.683473	55.3451	1.7165
		1|3|CPEw|1|1	-0.829411	57.0412	1.66546			2|2|CPEw|1|2	-0.898534	56.8033	1.67244
		2|2|CPEw|1|2	-0.927959	57.6641	1.64747			1|2|pw|1|1	1.00416	57.0172	1.66616
		3|2|CPEw|1|1	-0.865468	59.3345	1.60109			1|2|CPEw|1|1	-0.850414	57.7702	1.64445
		1|2|CPEw|1|1	-0.886319	59.3512	1.60064			3|2|CPEw|1|1	-0.893067	57.8008	1.64357
		2|1|CPEw|1|2	-0.500694	60.5669	1.56851			2|1|CPEw|1|2	-0.298559	59.3723	1.60007
		1|1|CPEw|1|1	-0.674747	61.3786	1.54777			1|1|CPEw|1|1	-0.634666	60.276	1.57608
		3|2|CPEw|1|2	-0.799813	64.0445	1.48334			1|2|CPEw|1|2	-0.799813	60.8943	1.56008
		1|2|CPEw|1|2	-0.829294	64.1903	1.47998			3|2|CPEw|1|2	-0.839573	61.0821	1.55528
		2|1|CPEw|1|1	-0.660202	67.2098	1.41348			2|1|CPEw|1|1	-0.734234	70.8874	1.34015
		1|1|CPEw|1|2	-0.723626	79.0281	1.2021			1|1|CPEw|1|2	-0.720736	79.2427	1.19885
		1|1|p	-0.320768	85.192	1.11513			1|1|p	-0.234614	85.7861	1.10741
		3|1|CPEw|1|1	-0.782577	90.1356	1.05397			3|3|p	-0.269411	87.5536	1.08505
		3|1|p	-0.528349	93.9144	1.01156			1|1|pw|1|2	-1.90652	87.9721	1.07989
		3|3|p	-0.344376	95.4939	0.994828			3|1|CPEw|1|1	-0.78637	91.8631	1.03415
		1|1|pw|1|2	-2.64673	96.9611	0.979775			3|1|p	-0.528349	96.4978	0.984479
		2|1|rw|1|1	-0.533851	97.8526	0.970848			2|1|p	-0.466952	97.8228	0.971144
		2|1|p	-0.546102	97.9055	0.970323			1|1|CPE	-0.815173	99.2855	0.956837
		1|1|CPE	-0.853036	99.4879	0.95489			2|2|r	-0.362004	99.6175	0.953648
		2|1|CPE	-0.872176	99.6269	0.953558			2|1|CPE	-0.811664	99.6434	0.9534
		2|2|r	-0.359665	99.7629	0.952258			3|3|pw|1|2	-3.10705	99.7356	0.952518
		3|2|p	-0.442497	99.7979	0.951924			3|2|p	-0.443115	99.7441	0.952438
		2|2|CPE	-0.36202	99.8029	0.951876			1|1|rw|1|1	-1.32208	99.9435	0.950537
		3|3|pw|1|2	-3.10705	99.8689	0.951247			2|3|r	-0.417486	99.9831	0.950161
		3|1|CPEw|1|2	-0.764257	99.95	0.950475			3|1|r	-0.856968	99.9864	0.95013
		1|1|rw|1|1	-1.32208	99.9577	0.950402			2|1|r	-0.506405	99.9871	0.950123
		3|1|r	-0.856968	99.9641	0.950342			3|2|pw|1|2	-3.88252	99.9934	0.950063
		3|2|pw|1|2	-3.89528	99.9895	0.9501			2|1|pw|1|2	-7.73475	99.9937	0.95006
		2|1|pw|1|2	-7.04401	99.9913	0.950083			3|2|CPE	-0.547934	99.9966	0.950032
		2|1|r	-0.499701	99.9918	0.950077			2|1|pw|1|1	-3.14465	99.9969	0.950029
		2|1|pw|1|1	-3.14465	99.9958	0.95004			3|3|r	-0.501282	99.9976	0.950023
		3|2|r	-0.548109	99.9969	0.950029			2|1|rw|1|1	-1.64072	99.9985	0.950015
		3|2|CPE	-0.547934	99.998	0.950019			3|1|CPEw|1|2	-0.807179	99.9988	0.950011
		3|3|CPE	-0.501102	99.9985	0.950014			2|2|CPE	-0.565608	99.999	0.950009
		3|3|r	-0.555149	99.9998	0.950002			3|2|r	-0.625172	99.9996	0.950004
		2|1|rw|1|2	-2.14482	99.9999	0.95			3|3|CPE	-0.549671	99.9996	0.950004
		2|3|r	-0.579531	100	0.95			2|1|rw|1|2	-2.19844	100	0.95
		2|3|CPE	-0.615047	100	0.95			2|3|CPE	-0.613547	100	0.95
		3|1|pw|1|2	-1.10117	100	0.95			3|1|pw|1|2	-1.13471	100	0.95
		3|3|pw|1|1	-8.35097	100	0.95			1|1|rw|1|2	-3.73948	100	0.95
		1|2|rw|1|1	-0.981613	100	0.95			3|3|pw|1|1	-8.37232	100	0.95
		3|2|rw|1|1	-0.981613	100	0.95			3|2|rw|1|1	-0.981613	100	0.95
		3|2|pw|1|1	-7.32305	100	0.95			1|2|rw|1|1	-0.982875	100	0.95
		1|2|rw|1|2	-1.02718	100	0.95			3|1|pw|1|1	-1.66186	100	0.95
		3|2|rw|1|2	-1.02718	100	0.95			2|2|rw|1|2	-1.00937	100	0.95
		3|1|pw|1|1	-1.66186	100	0.95			3|2|rw|1|2	-1.02718	100	0.95
		2|2|rw|1|2	-1.01234	100	0.95			1|2|rw|1|2	-1.02793	100	0.95
		3|1|rw|1|2	-0.647693	100	0.95			3|3|rw|1|1	-1.01127	100	0.95
		3|3|rw|1|1	-1.01126	100	0.95			1|3|rw|1|1	-1.01742	100	0.95
		1|3|rw|1|1	-1.01241	100	0.95			1|3|rw|1|2	-1.02145	100	0.95
		1|3|rw|1|2	-1.02056	100	0.95			3|3|rw|1|2	-1.02156	100	0.95
		3|3|rw|1|2	-1.02156	100	0.95			3|1|rw|1|2	-0.656903	100	0.95
		3|1|CPE	-0.914323	100	0.95			3|2|pw|1|1	-7.43262	100	0.95
		3|1|rw|1|1	-0.8507	100	0.95			2|2|rw|1|1	-1.32425	100	0.95
		2|2|rw|1|1	-1.32211	100	0.95			2|3|rw|1|1	-1.19815	100	0.95
		2|2|pw|1|1	-28.6218	100	0.95			2|3|rw|1|2	-1.21362	100	0.95
		2|3|rw|1|1	-1.1979	100	0.95			3|1|CPE	-0.914323	100	0.95
		2|3|pw|1|1	-40.9036	100	0.95			3|1|rw|1|1	-0.850083	100	0.95
		1|1|rw|1|2	-8.12197	100	0.95			2|2|pw|1|1	-21.3193	100	0.95
		2|3|rw|1|2	-1.82806	100	0.95			2|3|pw|1|1	-40.9036	100	0.95
		2|3|pw|1|2	-60.505	100	0.95			2|3|pw|1|2	-60.505	100	0.95
